# Supplementary material for: Mendelian randomization reveals association between retinal thickness and non-motor symptoms of Parkinson’s disease
Source: PubMed Central journal article supplement (PMC10719335; doi:10.1038/s41531-023-00611-z), 2023-12-13
Supplement: 41531_2023_611_MOESM1_ESM.pdf [file 41531_2023_611_MOESM1_ESM.pdf]

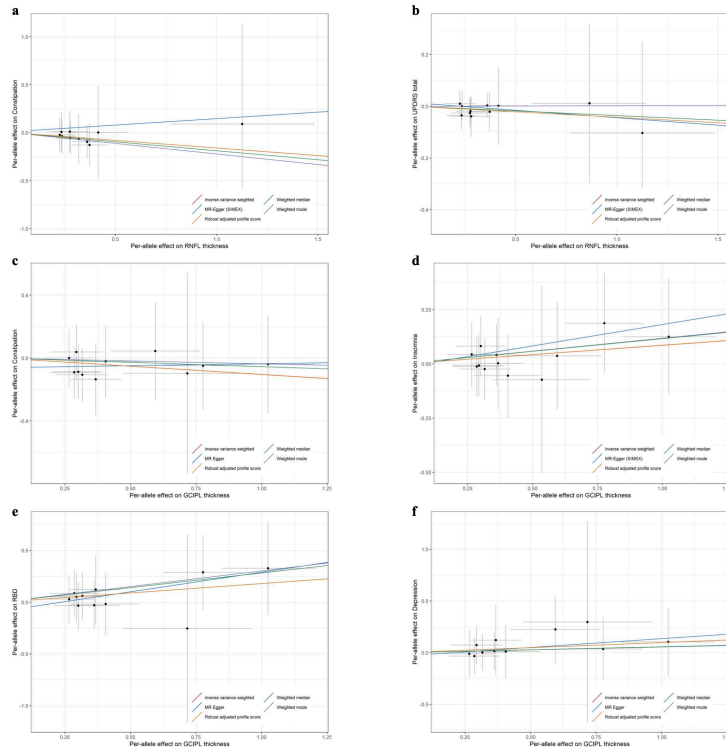

**Supplementary Figure 1 Scatter plot of Mendelian randomization study on the association between retinal thickness and Parkinson's disease**

Scatter plot showing the effects of single nucleotide polymorphisms on retinal nerve fiber layer (RNFL) thickness or ganglion cell inner plexiform layer (GCIPL) thickness against their effects on Parkinson's disease (PD) outcomes. The model fit lines indicate Mendelian randomization (MR) estimates from different MR methods. (a) RNFL thickness against constipation, (b) RNFL thickness against Unified Parkinson's Disease Rating Scale (UPDRS) total scale, (c) GCIPL thickness against constipation, (d) GCIPL thickness against insomnia, (e) GCIPL thickness against rapid eye movement sleep behavior disorder, (f) GCIPL thickness against depression

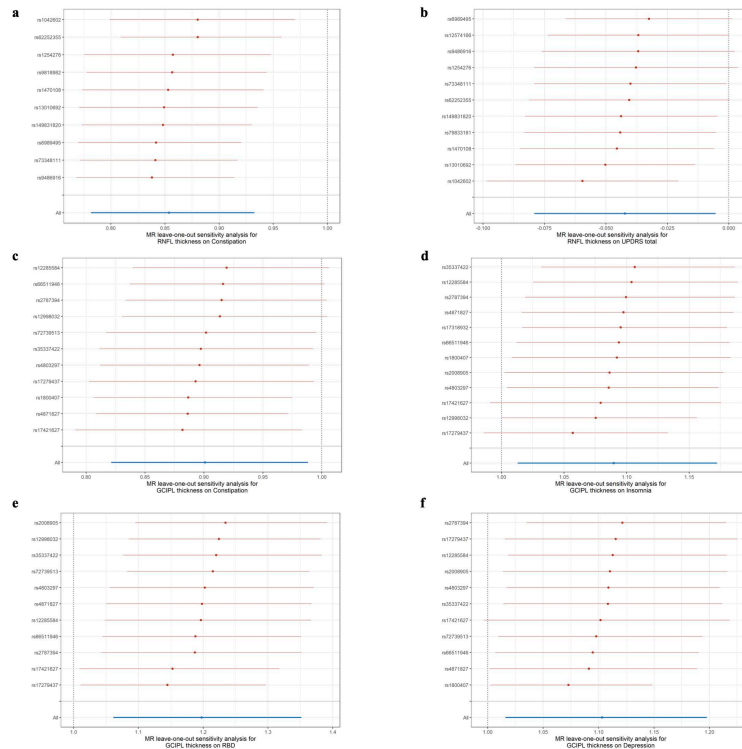

**Supplementary Figure 2 Leave-one-out plot of the Mendelian randomization study on the association between retinal thickness and Parkinson's disease**

Leave-one-out approach to identify potentially influential single nucleotide polymorphisms that exert a significant impact on association. Association between (a) retinal nerve fiber layer (RNFL) thickness and constipation, (b) RNFL thickness and Unified Parkinson's Disease Rating Scale (UPDRS) total scale, (c) ganglion cell inner plexiform layer (GCIPL) thickness and constipation, (d) GCIPL thickness and insomnia, (e) GCIPL thickness and rapid eye movement sleep behavior disorder (RBD), and (f) GCIPL thickness and depression.

**Supplementary Table 1 The information related to exposure and outcome phenotype used in this study**

| Trait              | Variable type | Sample Size | Population | References                      |
|--------------------|---------------|-------------|------------|---------------------------------|
| <b>Exposure</b>    |               |             |            |                                 |
| RNFL thickness     | Continuous    | 31,434      | Europeans  | Currant et al <sup>1</sup>      |
| GCIPL thickness    | Continuous    | 31,434      | Europeans  | Currant et al <sup>1</sup>      |
| <b>Outcome</b>     |               |             |            |                                 |
| PD Risk at onset   | Binomial      | 482,730     | Europeans  | Nalls et al <sup>2</sup>        |
| PD Age at onset    | Continuous    | 17,996      | Europeans  | Blauwendraat et al <sup>3</sup> |
| PD Progression     |               | 4093        | Europeans  | Iwaki et al <sup>4</sup>        |
| HY3                | Binomial      |             |            |                                 |
| Motor fluctuations | Binomial      |             |            |                                 |
| Dyskinesias        | Binomial      |             |            |                                 |
| Dementia           | Binomial      |             |            |                                 |
| Depression         | Binomial      |             |            |                                 |
| RBD                | Binomial      |             |            |                                 |
| Constipation       | Binomial      |             |            |                                 |
| Daytime sleepiness | Binomial      |             |            |                                 |
| Insomnia           | Binomial      |             |            |                                 |
| Hyposmia           | Binomial      |             |            |                                 |
| MoCA               | Continuous    |             |            |                                 |
| MMSE               | Continuous    |             |            |                                 |
| UPDRS I-IV & total | Continuous    |             |            |                                 |
| Modified SEADL     | Continuous    |             |            |                                 |

Abbreviations: RNFL, Retinal nerve fibre layer; GCIPL, Ganglion cell inner plexiform layer; HY3, Hoehn-Yahr stage of 3 or more; RBD, Rapid eye movement sleep behaviour disorder; UPDRS, Unified Parkinson's Disease Rating Scale; MMSE, Mini-Mental State Examination; MoCA, Montreal Cognitive Assessment; SEADL, Schwab and England Activities of Daily Living Scale.

**Supplementary Table 2 Correlation assessment of instrumental variables with the thickness of the retinal nerve fiber layer and the ganglion cell inner plexiform layer**

| Exposure        | Outcome            | No. SNPs | PVE    | mean F-Statistic (min, max) | I <sup>2</sup> <sub>(GX)</sub> |
|-----------------|--------------------|----------|--------|-----------------------------|--------------------------------|
| RNFL thickness  | Risk               | 21       | 0.0359 | 53.87(29.90,115.48)         | 0.84                           |
| RNFL thickness  | Constipation       | 10       | 0.0147 | 46.22(30.99, 92.98)         | 0.76                           |
| RNFL thickness  | Daytime sleepiness | 12       | 0.0184 | 48.18(29.90,109.13)         | 0.85                           |
| RNFL thickness  | Dementia           | 13       | 0.0206 | 49.90(30.69,109.13)         | 0.83                           |
| RNFL thickness  | Depression         | 11       | 0.0156 | 44.74(29.90, 92.98)         | 0.78                           |
| RNFL thickness  | Dyskinesias        | 7        | 0.0113 | 50.67(30.99, 92.98)         | 0.59                           |
| RNFL thickness  | HY3                | 9        | 0.0136 | 47.62(29.90, 92.98)         | 0.82                           |
| RNFL thickness  | Hyposmia           | 11       | 0.0184 | 52.72(30.99,109.13)         | 0.84                           |
| RNFL thickness  | Insomnia           | 14       | 0.0215 | 48.47(30.69,109.13)         | 0.83                           |
| RNFL thickness  | Motor fluctuation  | 8        | 0.0125 | 49.14(32.52, 92.98)         | 0.50                           |
| RNFL thickness  | RBD                | 8        | 0.0140 | 55.15(29.90,109.13)         | 0.86                           |
| RNFL thickness  | AAO                | 16       | 0.0237 | 46.69(30.54,115.48)         | 0.77                           |
| RNFL thickness  | UPDRS total        | 11       | 0.0158 | 45.17(30.69, 92.98)         | 0.81                           |
| RNFL thickness  | UPDRS1             | 12       | 0.0168 | 44.12(30.69, 92.98)         | 0.80                           |
| RNFL thickness  | UPDRS2             | 11       | 0.0157 | 44.81(30.69, 92.98)         | 0.74                           |
| RNFL thickness  | UPDRS3             | 14       | 0.0214 | 48.08(29.90,109.13)         | 0.80                           |
| RNFL thickness  | UPDRS4             | 9        | 0.0136 | 47.47(30.69, 92.98)         | 0.77                           |
| RNFL thickness  | MMSE               | 10       | 0.0146 | 46.11(30.69, 92.98)         | 0.83                           |
| RNFL thickness  | MoCA               | 7        | 0.0095 | 42.78(30.69, 67.96)         | 0.79                           |
| RNFL thickness  | SEADL              | 11       | 0.0156 | 44.71(29.90, 92.98)         | 0.77                           |
| GCIPL thickness | Risk               | 21       | 0.0353 | 52.96(30.55,127.50)         | 0.86                           |
| GCIPL thickness | Constipation       | 11       | 0.0184 | 52.66(30.55,127.50)         | 0.91                           |
| GCIPL thickness | Daytime sleepiness | 11       | 0.0189 | 54.17(30.55,127.50)         | 0.91                           |
| GCIPL thickness | Dementia           | 12       | 0.0194 | 50.92(30.55,127.50)         | 0.90                           |
| GCIPL thickness | Depression         | 11       | 0.0189 | 54.21(30.55,127.50)         | 0.90                           |
| GCIPL thickness | Dyskinesias        | 9        | 0.0163 | 57.00(30.55,127.50)         | 0.92                           |
| GCIPL thickness | HY3                | 10       | 0.0172 | 54.14(30.95,127.50)         | 0.91                           |
| GCIPL thickness | Hyposmia           | 11       | 0.0184 | 52.58(30.55,127.50)         | 0.90                           |
| GCIPL thickness | Insomnia           | 12       | 0.0201 | 52.82(30.55,127.50)         | 0.89                           |
| GCIPL thickness | Motor fluctuation  | 8        | 0.0156 | 61.48(30.55,127.50)         | 0.93                           |
| GCIPL thickness | RBD                | 11       | 0.0187 | 53.48(30.55,127.50)         | 0.90                           |
| GCIPL thickness | AAO                | 21       | 0.0353 | 52.96(30.55,127.50)         | 0.86                           |
| GCIPL thickness | UPDRS total        | 12       | 0.0197 | 51.60(30.55,127.50)         | 0.89                           |
| GCIPL thickness | UPDRS1             | 11       | 0.0184 | 52.58(30.55,127.50)         | 0.90                           |
| GCIPL thickness | UPDRS2             | 10       | 0.0174 | 54.75(30.55,127.50)         | 0.91                           |
| GCIPL thickness | UPDRS3             | 11       | 0.0190 | 54.49(30.55,127.50)         | 0.91                           |
| GCIPL thickness | UPDRS4             | 12       | 0.0201 | 52.66(30.55,127.50)         | 0.90                           |
| GCIPL thickness | MMSE               | 9        | 0.0141 | 49.18(30.55,127.50)         | 0.89                           |
| GCIPL thickness | MoCA               | 8        | 0.0152 | 59.71(30.55,127.50)         | 0.93                           |
| GCIPL thickness | SEADL              | 13       | 0.0212 | 51.27(30.55,127.50)         | 0.89                           |

Abbreviations: SNP, Single nucleotide polymorphism; PVE, Proportion of phenotypic Variance Explained; RNFL, Retinal nerve fibre layer; GCIPL, Ganglion cell inner plexiform layer; HY3, Hoehn-Yahr stage of 3 or more; RBD, Rapid eye movement sleep behaviour disorder; AAO, Age at Onset; UPDRS, Unified Parkinson's Disease Rating Scale; MMSE, Mini-Mental State Examination; MoCA, Montreal Cognitive Assessment; SEADL, Schwab and England Activities of Daily Living Scale

**Supplementary Table 3 Heterogeneity test for association estimates of retinal nerve fiber layer and ganglion cell inner plexiform layer thickness and Parkinson's disease**

| Exposure        | Outcome            | No. SNPs | Q     | DF | P    | I <sup>2</sup> |
|-----------------|--------------------|----------|-------|----|------|----------------|
| RNFL thickness  | Risk               | 21       | 26.30 | 20 | 0.16 | 0.24           |
| RNFL thickness  | Constipation       | 10       | 1.39  | 9  | 1.00 | 0.00           |
| RNFL thickness  | Daytime sleepiness | 12       | 3.83  | 11 | 0.97 | 0.00           |
| RNFL thickness  | Dementia           | 13       | 9.36  | 12 | 0.67 | 0.00           |
| RNFL thickness  | Depression         | 11       | 4.57  | 10 | 0.92 | 0.00           |
| RNFL thickness  | Dyskinesias        | 7        | 2.49  | 6  | 0.87 | 0.00           |
| RNFL thickness  | HY3                | 9        | 4.87  | 8  | 0.77 | 0.00           |
| RNFL thickness  | Hyposmia           | 11       | 3.11  | 10 | 0.98 | 0.00           |
| RNFL thickness  | Insomnia           | 14       | 6.30  | 13 | 0.93 | 0.00           |
| RNFL thickness  | Motor fluctuation  | 8        | 4.10  | 7  | 0.77 | 0.00           |
| RNFL thickness  | RBD                | 8        | 1.96  | 7  | 0.96 | 0.00           |
| RNFL thickness  | AAO                | 16       | 15.63 | 15 | 0.41 | 0.04           |
| RNFL thickness  | UPDRS total        | 11       | 3.20  | 10 | 0.98 | 0.00           |
| RNFL thickness  | UPDRS1             | 12       | 3.30  | 11 | 0.99 | 0.00           |
| RNFL thickness  | UPDRS2             | 11       | 2.89  | 10 | 0.98 | 0.00           |
| RNFL thickness  | UPDRS3             | 14       | 8.60  | 13 | 0.80 | 0.00           |
| RNFL thickness  | UPDRS4             | 9        | 2.85  | 8  | 0.94 | 0.00           |
| RNFL thickness  | MMSE               | 10       | 7.04  | 9  | 0.63 | 0.00           |
| RNFL thickness  | MoCA               | 7        | 3.14  | 6  | 0.79 | 0.00           |
| RNFL thickness  | SEADL              | 11       | 6.10  | 10 | 0.81 | 0.00           |
| GCIPL thickness | Risk               | 21       | 32.16 | 20 | 0.04 | 0.38           |
| GCIPL thickness | Constipation       | 11       | 3.76  | 10 | 0.96 | 0.00           |
| GCIPL thickness | Daytime sleepiness | 11       | 6.95  | 10 | 0.73 | 0.00           |
| GCIPL thickness | Dementia           | 12       | 5.01  | 11 | 0.93 | 0.00           |
| GCIPL thickness | Depression         | 11       | 2.55  | 10 | 0.99 | 0.00           |
| GCIPL thickness | Dyskinesias        | 9        | 4.12  | 8  | 0.85 | 0.00           |
| GCIPL thickness | HY3                | 10       | 4.06  | 9  | 0.91 | 0.00           |
| GCIPL thickness | Hyposmia           | 11       | 7.35  | 10 | 0.69 | 0.00           |
| GCIPL thickness | Insomnia           | 12       | 4.03  | 11 | 0.97 | 0.00           |
| GCIPL thickness | Motor fluctuation  | 8        | 3.78  | 7  | 0.80 | 0.00           |
| GCIPL thickness | RBD                | 11       | 3.49  | 10 | 0.97 | 0.00           |
| GCIPL thickness | AAO                | 21       | 12.36 | 20 | 0.90 | 0.00           |
| GCIPL thickness | UPDRS total        | 12       | 7.29  | 11 | 0.77 | 0.00           |
| GCIPL thickness | UPDRS1             | 11       | 6.62  | 10 | 0.76 | 0.00           |
| GCIPL thickness | UPDRS2             | 10       | 6.21  | 9  | 0.72 | 0.00           |
| GCIPL thickness | UPDRS3             | 11       | 7.52  | 10 | 0.68 | 0.00           |
| GCIPL thickness | UPDRS4             | 12       | 3.20  | 11 | 0.99 | 0.00           |
| GCIPL thickness | MMSE               | 9        | 6.37  | 8  | 0.61 | 0.00           |
| GCIPL thickness | MoCA               | 8        | 3.89  | 7  | 0.79 | 0.00           |
| GCIPL thickness | SEADL              | 13       | 5.41  | 12 | 0.94 | 0.00           |

Abbreviations: SNP, Single nucleotide polymorphism; RNFL, Retinal nerve fibre layer; GCIPL, Ganglion cell inner plexiform layer; HY3, Hoehn-Yahr stage of 3 or more; RBD, Rapid eye movement sleep behaviour disorder; AAO, Age at Onset; UPDRS, Unified Parkinson's Disease Rating Scale; MMSE, Mini-Mental State Examination; MoCA, Montreal Cognitive Assessment; SEADL, Schwab and England Activities of Daily Living Scale

**Supplementary Table 4 Pleiotropy tests for association estimates of retinal nerve fiber layer and ganglion cell inner plexiform layer thickness and Parkinson's disease**

| Exposure        | Outcome            | MR-Egger             |       | MR-PRESSO global test |       |
|-----------------|--------------------|----------------------|-------|-----------------------|-------|
|                 |                    | Intercept (95%CI)    | P     | RSSobs                | P     |
| RNFL thickness  | Risk               | -0.033(-0.067,0.000) | 0.068 | 28.901                | 0.158 |
| RNFL thickness  | Constipation       | 0.018(-0.241,0.277)  | 0.896 | 1.771                 | 0.998 |
| RNFL thickness  | Daytime sleepiness | -0.006(-0.241,0.229) | 0.962 | 5.076                 | 0.961 |
| RNFL thickness  | Dementia           | 0.078(-0.164,0.320)  | 0.541 | 11.358                | 0.657 |
| RNFL thickness  | Depression         | 0.101(-0.180,0.382)  | 0.499 | 5.440                 | 0.921 |
| RNFL thickness  | Dyskinesias        | -0.156(-0.633,0.320) | 0.549 | 3.432                 | 0.870 |
| RNFL thickness  | HY3                | -0.202(-0.540,0.137) | 0.281 | 6.028                 | 0.781 |
| RNFL thickness  | Hyposmia           | -0.020(-0.287,0.247) | 0.885 | 4.627                 | 0.961 |
| RNFL thickness  | Insomnia           | 0.081(-0.103,0.266)  | 0.404 | 7.424                 | 0.933 |
| RNFL thickness  | Motor fluctuation  | 0.071(-0.276,0.418)  | 0.702 | 5.703                 | 0.754 |
| RNFL thickness  | RBD                | 0.040(-0.352,0.431)  | 0.849 | 2.562                 | 0.962 |
| RNFL thickness  | AAO                | 0.034(-0.237,0.304)  | 0.811 | 18.043                | 0.404 |
| RNFL thickness  | UPDRS total        | -0.010(-0.082,0.062) | 0.800 | 4.131                 | 0.973 |
| RNFL thickness  | UPDRS1             | -0.021(-0.121,0.080) | 0.696 | 3.984                 | 0.985 |
| RNFL thickness  | UPDRS2             | -0.010(-0.116,0.096) | 0.861 | 3.459                 | 0.987 |
| RNFL thickness  | UPDRS3             | -0.040(-0.115,0.034) | 0.308 | 10.299                | 0.799 |
| RNFL thickness  | UPDRS4             | 0.047(-0.055,0.150)  | 0.395 | 5.108                 | 0.872 |
| RNFL thickness  | MMSE               | 0.000(-0.136,0.135)  | 0.997 | 8.669                 | 0.656 |
| RNFL thickness  | MoCA               | -0.102(-0.582,0.378) | 0.694 | 4.309                 | 0.788 |
| RNFL thickness  | SEADL              | 0.014(-0.698,0.727)  | 0.970 | 7.705                 | 0.781 |
| GCIPL thickness | Risk               | -0.031(-0.063,0.002) | 0.083 | 34.748                | 0.055 |
| GCIPL thickness | Constipation       | -0.061(-0.207,0.085) | 0.432 | 4.469                 | 0.960 |
| GCIPL thickness | Daytime sleepiness | -0.051(-0.203,0.101) | 0.527 | 9.157                 | 0.687 |
| GCIPL thickness | Dementia           | 0.038(-0.108,0.183)  | 0.621 | 5.672                 | 0.947 |
| GCIPL thickness | Depression         | -0.034(-0.199,0.130) | 0.691 | 2.978                 | 0.994 |
| GCIPL thickness | Dyskinesias        | 0.013(-0.172,0.199)  | 0.891 | 6.370                 | 0.774 |
| GCIPL thickness | HY3                | 0.001(-0.229,0.231)  | 0.993 | 6.273                 | 0.837 |
| GCIPL thickness | Hyposmia           | -0.026(-0.164,0.112) | 0.722 | 9.232                 | 0.676 |
| GCIPL thickness | Insomnia           | -0.046(-0.167,0.076) | 0.479 | 4.915                 | 0.965 |
| GCIPL thickness | Motor fluctuation  | -0.121(-0.279,0.038) | 0.186 | 5.938                 | 0.735 |
| GCIPL thickness | RBD                | -0.088(-0.287,0.111) | 0.408 | 4.447                 | 0.963 |
| GCIPL thickness | AAO                | 0.004(-0.177,0.185)  | 0.967 | 13.589                | 0.902 |
| GCIPL thickness | UPDRS total        | 0.017(-0.025,0.060)  | 0.444 | 10.385                | 0.679 |
| GCIPL thickness | UPDRS1             | -0.005(-0.057,0.046) | 0.840 | 7.704                 | 0.785 |
| GCIPL thickness | UPDRS2             | -0.036(-0.088,0.016) | 0.208 | 8.193                 | 0.685 |
| GCIPL thickness | UPDRS3             | 0.022(-0.022,0.066)  | 0.358 | 9.545                 | 0.662 |
| GCIPL thickness | UPDRS4             | -0.010(-0.060,0.039) | 0.690 | 4.105                 | 0.987 |
| GCIPL thickness | MMSE               | 0.018(-0.070,0.106)  | 0.700 | 7.824                 | 0.631 |
| GCIPL thickness | MoCA               | -0.066(-0.305,0.173) | 0.606 | 6.377                 | 0.705 |
| GCIPL thickness | SEADL              | -0.129(-0.543,0.286) | 0.555 | 6.653                 | 0.935 |

Abbreviations: MR-PRESSO, Mendelian Randomisation Pleiotropy RESidual Sum and Outlier; RNFL, Retinal nerve fibre layer; GCIPL, Ganglion cell inner plexiform layer; HY3, Hoehn-Yahr stage of 3 or more; RBD, Rapid eye movement sleep behaviour disorder; AAO, Age at Onset; UPDRS, Unified Parkinson's Disease Rating Scale; MMSE, Mini-Mental State Examination; MoCA, Montreal Cognitive Assessment; SEADL, Schwab and England Activities of Daily Living Scale

**Supplementary Table 5 Power calculations for Mendelian randomization study of association between retinal thickness and Parkinson's disease**

| Exposure        | Outcome            | No. SNPs | Power <sup>#</sup> |
|-----------------|--------------------|----------|--------------------|
| RNFL thickness  | Risk               | 21       | 100.0%             |
| RNFL thickness  | Constipation       | 10       | 9.7%               |
| RNFL thickness  | Daytime sleepiness | 12       | 11.1%              |
| RNFL thickness  | Dementia           | 13       | 13.0%              |
| RNFL thickness  | Depression         | 11       | 10.7%              |
| RNFL thickness  | Dyskinesias        | 7        | 7.9%               |
| RNFL thickness  | HY3                | 9        | 8.8%               |
| RNFL thickness  | Hyposmia           | 11       | 10.2%              |
| RNFL thickness  | Insomnia           | 14       | 13.2%              |
| RNFL thickness  | Motor fluctuation  | 8        | 9.5%               |
| RNFL thickness  | RBD                | 8        | 7.5%               |
| RNFL thickness  | AAO                | 16       | 98.5%              |
| RNFL thickness  | UPDRS total        | 11       | 24.1%              |
| RNFL thickness  | UPDRS1             | 12       | 20.1%              |
| RNFL thickness  | UPDRS2             | 11       | 19.9%              |
| RNFL thickness  | UPDRS3             | 14       | 26.5%              |
| RNFL thickness  | UPDRS4             | 9        | 15.7%              |
| RNFL thickness  | MMSE               | 10       | 16.8%              |
| RNFL thickness  | MoCA               | 7        | 9.1%               |
| RNFL thickness  | SEADL              | 11       | 19.6%              |
| GCIPL thickness | Risk               | 21       | 100.0%             |
| GCIPL thickness | Constipation       | 11       | 11.1%              |
| GCIPL thickness | Daytime sleepiness | 11       | 11.8%              |
| GCIPL thickness | Dementia           | 12       | 12.0%              |
| GCIPL thickness | Depression         | 11       | 12.2%              |
| GCIPL thickness | Dyskinesias        | 9        | 10.1%              |
| GCIPL thickness | HY3                | 10       | 10.0%              |
| GCIPL thickness | Hyposmia           | 11       | 11.6%              |
| GCIPL thickness | Insomnia           | 12       | 12.9%              |
| GCIPL thickness | Motor fluctuation  | 8        | 10.6%              |
| GCIPL thickness | RBD                | 11       | 8.9%               |
| GCIPL thickness | AAO                | 21       | 99.9%              |
| GCIPL thickness | UPDRS total        | 12       | 28.7%              |
| GCIPL thickness | UPDRS1             | 11       | 23.9%              |
| GCIPL thickness | UPDRS2             | 10       | 23.9%              |
| GCIPL thickness | UPDRS3             | 11       | 27.4%              |
| GCIPL thickness | UPDRS4             | 12       | 18.4%              |
| GCIPL thickness | MMSE               | 9        | 18.0%              |
| GCIPL thickness | MoCA               | 8        | 12.2%              |
| GCIPL thickness | SEADL              | 13       | 24.0%              |

# Power to detect an OR of 1.2 for each binomial outcome or a 0.2 SD increase for each continuous outcome.

Abbreviations: SNP, Single nucleotide polymorphism; PVE, Proportion of phenotypic Variance Explained; RNFL, Retinal nerve fibre layer; GCIPL, Ganglion cell inner plexiform layer; HY3, Hoehn-Yahr stage of 3 or more; RBD, Rapid eye movement sleep behaviour disorder; AAO, Age at Onset; UPDRS, Unified Parkinson's Disease Rating Scale; MMSE, Mini-Mental State Examination; MoCA, Montreal Cognitive Assessment; SEADL, Schwab and England Activities of Daily Living Scale

**Supplementary Table 6 STROBE-MR checklist of recommended items to address in reports of Mendelian randomization studies <sup>5,6</sup>**

| Item No.            | Section                       | Checklist item                                                                                                                                                                                                                            | Page No. | Relevant text from manuscript                                                                                                                                                                                                                                                                                                                                                                                                           |
|---------------------|-------------------------------|-------------------------------------------------------------------------------------------------------------------------------------------------------------------------------------------------------------------------------------------|----------|-----------------------------------------------------------------------------------------------------------------------------------------------------------------------------------------------------------------------------------------------------------------------------------------------------------------------------------------------------------------------------------------------------------------------------------------|
| 1                   | TITLE and ABSTRACT            | Indicate Mendelian randomization (MR) as the study's design in the title and/or the abstract if that is a main purpose of the study                                                                                                       | 1,2      | The term "Mendelian randomization" was incorporated into both the title and abstract.                                                                                                                                                                                                                                                                                                                                                   |
| <b>INTRODUCTION</b> |                               |                                                                                                                                                                                                                                           |          |                                                                                                                                                                                                                                                                                                                                                                                                                                         |
| 2                   | Background                    | Explain the scientific background and rationale for the reported study. What is the exposure? Is a potential causal relationship between exposure and outcome plausible? Justify why MR is a helpful method to address the study question | 3,4      | Introduction, Paragraph 1-4                                                                                                                                                                                                                                                                                                                                                                                                             |
| 3                   | Objectives                    | State specific objectives clearly, including pre-specified causal hypotheses (if any). State that MR is a method that, under specific assumptions, intends to estimate causal effects                                                     | 4,5      | Introduction, Paragraph 5                                                                                                                                                                                                                                                                                                                                                                                                               |
| <b>METHODS</b>      |                               |                                                                                                                                                                                                                                           |          |                                                                                                                                                                                                                                                                                                                                                                                                                                         |
| 4                   | Study design and data sources | Present key elements of the study design early in the article. Consider including a table listing sources of data for all phases of the study. For each data source contributing to the analysis, describe the following:                 |          |                                                                                                                                                                                                                                                                                                                                                                                                                                         |
|                     | a)                            | Setting: Describe the study design and the underlying population, if possible. Describe the setting, locations, and relevant dates, including periods of recruitment, exposure, follow-up, and data collection, when available.           | 12       | Method, Section "Acquisition of instrumental variables", Paragraph 1. Figure 1 depicts the flowchart of this study.                                                                                                                                                                                                                                                                                                                     |
|                     | b)                            | Participants: Give the eligibility criteria, and the sources and methods of selection of participants. Report the sample size, and whether any power or sample size calculations were carried out prior to the main analysis              | 12-15,17 | Method, Information regarding the GWAS has been presented in the sections "Acquisition of instrumental variables related to retinal thickness" and "Acquisition of instrumental variables related to PD".<br><br>Furthermore, Table S1 also provides the Information about the GWAS on exposure and outcome in this study.<br><br>The section "Power calculations" provides the method for calculating statistical power in this study. |
|                     | c)                            | Describe measurement, quality control and selection of genetic variants                                                                                                                                                                   | 12-15    | Method, Sections "Acquisition of instrumental                                                                                                                                                                                                                                                                                                                                                                                           |



|   |                                    |                                                                                                                                                                                                                                      |       |                                                                                                                                                                                                                                                                                                                                                                                                                                                       |
|---|------------------------------------|--------------------------------------------------------------------------------------------------------------------------------------------------------------------------------------------------------------------------------------|-------|-------------------------------------------------------------------------------------------------------------------------------------------------------------------------------------------------------------------------------------------------------------------------------------------------------------------------------------------------------------------------------------------------------------------------------------------------------|
|   |                                    |                                                                                                                                                                                                                                      |       | variables related to retinal thickness" and "Acquisition of instrumental variables related to PD"                                                                                                                                                                                                                                                                                                                                                     |
|   | d)                                 | For each exposure, outcome, and other relevant variables, describe methods of assessment and diagnostic criteria for diseases                                                                                                        | 12-15 | Method, the association analysis model and adjusted covariates for the GWAS study on retinal thickness are described in the section "Acquisition of instrumental variables related to retinal thickness". The measurement method of Parkinson's disease-related outcome phenotypes is briefly described in the section "Acquisition of instrumental variables related to PD", and more specific explanations can be found in the original GWAS study. |
|   | e)                                 | Provide details of ethics committee approval and participant informed consent, if relevant                                                                                                                                           | N/A   | The summary data utilized in this study were extracted from published GWAS that had already passed ethical review. Hence, this study does not require additional ethical approval.                                                                                                                                                                                                                                                                    |
| 5 | Assumptions                        | Explicitly state the three core IV assumptions for the main analysis (relevance, independence and exclusion restriction) as well assumptions for any additional or sensitivity analysis                                              | 15.18 | Method, Section "Assessment of instrumental variables" and "Sensitivity Analysis"                                                                                                                                                                                                                                                                                                                                                                     |
| 6 | Statistical methods: main analysis | Describe statistical methods and statistics used                                                                                                                                                                                     |       |                                                                                                                                                                                                                                                                                                                                                                                                                                                       |
|   | a)                                 | Describe how quantitative variables were handled in the analyses (i.e., scale, units, model)                                                                                                                                         | N/A   |                                                                                                                                                                                                                                                                                                                                                                                                                                                       |
|   | b)                                 | Describe how genetic variants were handled in the analyses and, if applicable, how their weights were selected                                                                                                                       | 12-16 | Method, In the sections "Acquisition of instrumental variables" and "Assessment of instrumental variables", we described the process of manipulating genetic variations.                                                                                                                                                                                                                                                                              |
|   | c)                                 | Describe the MR estimator (e.g. two-stage least squares, Wald ratio) and related statistics. Detail the included covariates and, in case of two-sample MR, whether the same covariate set was used for adjustment in the two samples | 16-19 | Method, We described the details of the MR estimator and related statistics used in this study in the sections on "Mendelian randomization analysis" and "Sensitivity Analysis"                                                                                                                                                                                                                                                                       |
|   | d)                                 | Explain how missing data were addressed                                                                                                                                                                                              | N/A   |                                                                                                                                                                                                                                                                                                                                                                                                                                                       |
|   | e)                                 | If applicable, indicate how multiple testing was addressed                                                                                                                                                                           | 17    | "To correct for multiple hypothesis testing, we utilized the false discovery                                                                                                                                                                                                                                                                                                                                                                          |

|                |                                              |                                                                                                                                                                                                                                                                                                                          |       |                                                                                                                                                                                                                                                                                        |
|----------------|----------------------------------------------|--------------------------------------------------------------------------------------------------------------------------------------------------------------------------------------------------------------------------------------------------------------------------------------------------------------------------|-------|----------------------------------------------------------------------------------------------------------------------------------------------------------------------------------------------------------------------------------------------------------------------------------------|
|                |                                              |                                                                                                                                                                                                                                                                                                                          |       | rate (FDR) approach in this study"                                                                                                                                                                                                                                                     |
| 7              | Assessment of assumptions                    | Describe any methods or prior knowledge used to assess the assumptions or justify their validity                                                                                                                                                                                                                         | 15-16 | This study used Cochran's Q test and I <sup>2</sup> statistic for heterogeneity assessment, and MR-PRESSO for pleiotropy evaluation. We provided a detailed description in the section "Assessment of instrumental variables".                                                         |
| 8              | Sensitivity analyses and additional analyses | Describe any sensitivity analyses or additional analyses performed (e.g. comparison of effect estimates from different approaches, independent replication, bias analytic techniques, validation of instruments, simulations)                                                                                            | 18-19 | Method, Section "Sensitivity Analysis"                                                                                                                                                                                                                                                 |
| 9              | Software and pre-registration                |                                                                                                                                                                                                                                                                                                                          |       |                                                                                                                                                                                                                                                                                        |
|                | a)                                           | Name statistical software and package(s), including version and settings used                                                                                                                                                                                                                                            | 20    | Method, The analyses were conducted with R version 4.2.0, utilizing several primary R packages. These packages included TwoSampleMR (version 0.5.6), MRPRESSO (version 1.0), mr.raps (version 0.2), and simex (version 1.8)                                                            |
|                | b)                                           | State whether the study protocol and details were pre-registered (as well as when and where)                                                                                                                                                                                                                             | N/A   |                                                                                                                                                                                                                                                                                        |
| <b>RESULTS</b> |                                              |                                                                                                                                                                                                                                                                                                                          |       |                                                                                                                                                                                                                                                                                        |
| 10             | Descriptive data                             |                                                                                                                                                                                                                                                                                                                          |       |                                                                                                                                                                                                                                                                                        |
|                | a)                                           | Report the numbers of individuals at each stage of included studies and reasons for exclusion. Consider use of a flow diagram                                                                                                                                                                                            | N/A   |                                                                                                                                                                                                                                                                                        |
|                | b)                                           | Report summary statistics for phenotypic exposure(s), outcome(s), and other relevant variables (e.g. means, SDs, proportions)                                                                                                                                                                                            | N/A   |                                                                                                                                                                                                                                                                                        |
|                | c)                                           | If the data sources include meta-analyses of previous studies, provide the assessments of heterogeneity across these studies                                                                                                                                                                                             | N/A   |                                                                                                                                                                                                                                                                                        |
|                | d)                                           | For two-sample MR: <ul style="list-style-type: none"> <li>i. Provide justification of the similarity of the genetic variant-exposure associations between the exposure and outcome samples</li> <li>ii. Provide information on the number of individuals who overlap between the exposure and outcome studies</li> </ul> | 12    | Discussion, in this study, there may be some overlap between the GWAS samples of retinal thickness and PD risk, but we cannot assess it specifically. However, the F-statistic in our study is large, so it is unlikely that this sample overlap will affect the results of our study. |

|                   |                                                                                                                                                                                                              |                                |                                                                                                                                                                                                                                                          |
|-------------------|--------------------------------------------------------------------------------------------------------------------------------------------------------------------------------------------------------------|--------------------------------|----------------------------------------------------------------------------------------------------------------------------------------------------------------------------------------------------------------------------------------------------------|
| <b>11</b>         | <b>Main results</b>                                                                                                                                                                                          |                                |                                                                                                                                                                                                                                                          |
| a)                | Report the associations between genetic variant and exposure, and between genetic variant and outcome, preferably on an interpretable scale                                                                  | Table S2                       |                                                                                                                                                                                                                                                          |
| b)                | Report MR estimates of the relationship between exposure and outcome, and the measures of uncertainty from the MR analysis, on an interpretable scale, such as odds ratio or relative risk per SD difference | Figure 2                       |                                                                                                                                                                                                                                                          |
| c)                | If relevant, consider translating estimates of relative risk into absolute risk for a meaningful time period                                                                                                 | N/A                            |                                                                                                                                                                                                                                                          |
| d)                | Consider plots to visualize results (e.g. forest plot, scatterplot of associations between genetic variants and outcome versus between genetic variants and exposure)                                        | Figure 2 and Figure S1         |                                                                                                                                                                                                                                                          |
| <b>12</b>         | <b>Assessment of assumptions</b>                                                                                                                                                                             |                                |                                                                                                                                                                                                                                                          |
| a)                | Report the assessment of the validity of the assumptions                                                                                                                                                     | Table S3 and S4                |                                                                                                                                                                                                                                                          |
| b)                | Report any additional statistics (e.g., assessments of heterogeneity across genetic variants, such as I <sup>2</sup> , Q statistic or E-value)                                                               | Table S3 and S4                |                                                                                                                                                                                                                                                          |
| <b>13</b>         | <b>Sensitivity analyses and additional analyses</b>                                                                                                                                                          |                                |                                                                                                                                                                                                                                                          |
| a)                | Report any sensitivity analyses to assess the robustness of the main results to violations of the assumptions                                                                                                | Table 1 and 2; Figure 3 and S2 |                                                                                                                                                                                                                                                          |
| b)                | Report results from other sensitivity analyses or additional analyses                                                                                                                                        | Table 1 and 2; Figure 3 and S2 |                                                                                                                                                                                                                                                          |
| c)                | Report any assessment of direction of causal relationship (e.g., bidirectional MR)                                                                                                                           | 14                             | Methods, "To circumvent the potential reverse causality of PD resulting in retinal thinning in this study, we employed the Steiger filtering method to exclude SNPs that explain a greater variance in PD-related traits compared to retinal thickness." |
| d)                | When relevant, report and compare with estimates from non-MR analyses                                                                                                                                        | N/A                            |                                                                                                                                                                                                                                                          |
| e)                | Consider additional plots to visualize results (e.g., leave-one-out analyses)                                                                                                                                | Figure S2                      |                                                                                                                                                                                                                                                          |
| <b>DISCUSSION</b> |                                                                                                                                                                                                              |                                |                                                                                                                                                                                                                                                          |

|                   |                  |                                                                                                                                                                                                                                                                                                                                                      |       |                                                                                                                                                                                                                                                                                                                                                                                                                                                                                                                                          |
|-------------------|------------------|------------------------------------------------------------------------------------------------------------------------------------------------------------------------------------------------------------------------------------------------------------------------------------------------------------------------------------------------------|-------|------------------------------------------------------------------------------------------------------------------------------------------------------------------------------------------------------------------------------------------------------------------------------------------------------------------------------------------------------------------------------------------------------------------------------------------------------------------------------------------------------------------------------------------|
| 14                | Key results      | Summarize key results with reference to study objectives                                                                                                                                                                                                                                                                                             | 8     | Discussion, "Utilizing the largest available GWAS datasets for PD, RNFL and GCIPL thickness, we performed a comprehensive two-sample MR analysis that provided evidence for an association between reduced RNFL and GCIPL thickness and nonmotor symptoms in PD."                                                                                                                                                                                                                                                                        |
| 15                | Limitations      | Discuss limitations of the study, taking into account the validity of the IV assumptions, other sources of potential bias, and imprecision. Discuss both direction and magnitude of any potential bias and any efforts to address them                                                                                                               | 11,12 | Discussion, Paragraph 6                                                                                                                                                                                                                                                                                                                                                                                                                                                                                                                  |
| 16                | Interpretation   |                                                                                                                                                                                                                                                                                                                                                      |       |                                                                                                                                                                                                                                                                                                                                                                                                                                                                                                                                          |
|                   | a)               | Meaning: Give a cautious overall interpretation of results in the context of their limitations and in comparison with other studies                                                                                                                                                                                                                  | 8-11  | Discussion, Paragraph 2-5                                                                                                                                                                                                                                                                                                                                                                                                                                                                                                                |
|                   | b)               | Mechanism: Discuss underlying biological mechanisms that could drive a potential causal relationship between the investigated exposure and the outcome, and whether the gene-environment equivalence assumption is reasonable. Use causal language carefully, clarifying that IV estimates may provide causal effects only under certain assumptions | 8-11  | Discussion, Paragraph 2-5, E.g. "implying that gut microbiota may serve as a mediator between retinal degenerative changes and constipation"                                                                                                                                                                                                                                                                                                                                                                                             |
|                   | c)               | Clinical relevance: Discuss whether the results have clinical or public policy relevance, and to what extent they inform effect sizes of possible interventions                                                                                                                                                                                      | 8-11  | Discussion, Paragraph 2-5, E.g. "The present study provides further evidence of a causal association between reduced GCIPL thickness and sleep disorders in patients with PD, suggesting that GCIPL may be an effective target that can be used to improve sleep disorders in PD" ; "mRGCs play a pivotal role in the regulation of circadian rhythms and melatonin secretion. A decrease in the number of mRGCs may precipitate disruptions in circadian rhythms and melatonin production, potentially culminating in sleep disorders." |
| 17                | Generalizability | Discuss the generalizability of the study results (a) to other populations, (b) across other exposure periods/timings, and (c) across other levels of exposure                                                                                                                                                                                       | 8-11  | Discussion, Paragraph 2-5                                                                                                                                                                                                                                                                                                                                                                                                                                                                                                                |
| OTHER INFORMATION |                  |                                                                                                                                                                                                                                                                                                                                                      |       |                                                                                                                                                                                                                                                                                                                                                                                                                                                                                                                                          |

|    |                       |                                                                                                                                                                                                                                                                                             |    |                             |
|----|-----------------------|---------------------------------------------------------------------------------------------------------------------------------------------------------------------------------------------------------------------------------------------------------------------------------------------|----|-----------------------------|
| 18 | Funding               | Describe sources of funding and the role of funders in the present study and, if applicable, sources of funding for the databases and original study or studies on which the present study is based                                                                                         | 20 | Acknowledgements            |
| 19 | Data and data sharing | Provide the data used to perform all analyses or report where and how the data can be accessed, and reference these sources in the article. Provide the statistical code needed to reproduce the results in the article, or report whether the code is publicly accessible and if so, where | 19 | Data Availability statement |
| 20 | Conflicts of Interest | All authors should declare all potential conflicts of interest                                                                                                                                                                                                                              | 20 | Competing Interests         |

This checklist is copyrighted by the Equator Network under the Creative Commons Attribution 3.0 Unported (CC BY 3.0) license.

## Reference

- 1 Currant, H. *et al.* Genetic variation affects morphological retinal phenotypes extracted from UK Biobank optical coherence tomography images. *PLoS Genet* **17**, e1009497 (2021). <https://doi.org/10.1371/journal.pgen.1009497>
- 2 Nalls, M. A. *et al.* Identification of novel risk loci, causal insights, and heritable risk for Parkinson's disease: a meta-analysis of genome-wide association studies. *Lancet Neurol* **18**, 1091-1102 (2019). [https://doi.org/10.1016/s1474-4422\(19\)30320-5](https://doi.org/10.1016/s1474-4422(19)30320-5)
- 3 Blauwendraat, C. *et al.* Parkinson's disease age at onset genome-wide association study: Defining heritability, genetic loci, and  $\alpha$ -synuclein mechanisms. *Mov Disord* **34**, 866-875 (2019). <https://doi.org/10.1002/mds.27659>
- 4 Iwaki, H. *et al.* Genomewide association study of Parkinson's disease clinical biomarkers in 12 longitudinal patients' cohorts. *Mov Disord* **34**, 1839-1850 (2019). <https://doi.org/10.1002/mds.27845>
- 5 Skrivankova, V. W. *et al.* Strengthening the Reporting of Observational Studies in Epidemiology Using Mendelian Randomization: The STROBE-MR Statement. *Jama* **326**, 1614-1621 (2021). <https://doi.org/10.1001/jama.2021.18236>
- 6 Skrivankova, V. W. *et al.* Strengthening the reporting of observational studies in epidemiology using mendelian randomisation (STROBE-MR): explanation and elaboration. *Bmj* **375**, n2233 (2021). <https://doi.org/10.1136/bmj.n2233>
